# Supplementary material
Source: PubMed Central journal article supplement (PMC4844551)
Supplement: NIHMS772986-supplement-table_1.pdf [file NIHMS772986-supplement-table_1.pdf]

**Supplemental Table 1. Gene Variant Functions and Carrier Frequencies by Race**

| Gene and SNP<br>Nucleotide Designation | Gene Function/ Variant Function                                                                                                                                                          | European Americans (205) |                                     | African Americans (205)                         |                                     |
|----------------------------------------|------------------------------------------------------------------------------------------------------------------------------------------------------------------------------------------|--------------------------|-------------------------------------|-------------------------------------------------|-------------------------------------|
|                                        |                                                                                                                                                                                          | Carrier Frequency (n)    | Proportion Missing (n) <sup>c</sup> | Carrier Frequency (n)                           | Proportion Missing (n) <sup>c</sup> |
| COMT Val158Met (rs4680)                | Metabolism of estrogens and neurotransmitters/ <b>Decreased enzyme activity</b>                                                                                                          | 0.663 (136) <sup>a</sup> | 0.078 (16)                          | 0.473 (97) <sup>a</sup><br>p<.001 <sup>d</sup>  | 0.166 (34)                          |
| CYP3A4*1 B (rs2740574)                 | Metabolism and hydroxylation of estrogens, activation of tobacco-related toxins/ <b>Increased metabolic activity</b>                                                                     | 0.07 (14) <sup>a</sup>   | 0.008 (16)                          | 0.693 (142) <sup>b</sup><br>p<.001 <sup>d</sup> | 0.122 (25)                          |
| CYP1B1*3 (Leu432Val, rs1056836)        | Metabolism and hydroxylation of estrogens, highly expressed in the ovary, induced by tobacco and involved in metabolic activation of smoking toxins/ <b>Increased metabolic activity</b> | 0.620 (127) <sup>a</sup> | 0.008 (16)                          | 0.839 (172) <sup>a</sup><br>p<.001 <sup>d</sup> | 0.102 (21)                          |
| CYP1B1*4 (Asn452Ser, rs1800440)        | Metabolism and hydroxylation of estrogens/ <b>Increased metabolic activity</b>                                                                                                           | 0.263 (54) <sup>a</sup>  | 0.008 (17)                          | 0.102 (21) <sup>a</sup><br>p<.001 <sup>d</sup>  | 0.102 (21)                          |

<sup>a</sup>Indicates no deviation from Hardy-Weinberg proportions at the  $P < .05$  level

<sup>b</sup>Indicates deviation from Hardy-Weinberg proportions

<sup>c</sup>Proportions of participants for whom genotyping could not be performed or testing could not be performed due to insufficient data

<sup>d</sup> $P$  value for difference in carrier frequency across race
