# Supplementary material
Source: PubMed Central journal article supplement (PMC4844551)
Supplement: NIHMS772986-supplement-table_2.pdf [file NIHMS772986-supplement-table_2.pdf]

**Supplemental Table 2. Median Time to Menopause According to Smoking Status in EA Carriers of *CYP 1B1*\*3 and *CYP 3A4* \*1F**

| Smoking Status | <i>CYP 3A4</i> *1B        | <i>CYP 3A4</i> WT     | <i>CYP 1B1</i> *3     | <i>CYP 1B1</i> WT               |
|----------------|---------------------------|-----------------------|-----------------------|---------------------------------|
|                | Median (p25, p75)         | Median (p25, p75)     | Median (p25, p75)     | Median (p25, p75)               |
| Non-smoker     | 13.91 y (10.28, 13.92)    | 10.27 y (8.99, 13.75) | 11.07 y (9.04, 13.91) | 10.08 y (7.28, 13.67)           |
| Light Smoker   | 11.36 y (NA) <sup>a</sup> | 11.26 y (9.03,13.51)  | 10.42 y (8.84, 13.51) | 11.36 y (9.03, NA) <sup>b</sup> |
| Heavy Smoker   | 5.09 y (5.09, 11.97)      | 11.04 y (6.25,12.13)  | 10.41 y (6.23, 11.97) | 11.06 y (4.28, 13.79)           |

p25, 25<sup>th</sup> percentile

p75, 75<sup>th</sup> percentile

NA, Not Available

<sup>a</sup>No estimate because only two participants were in this strata

<sup>b</sup>No estimate due to ongoing follow up
